# Supplementary material for: Inducible Expression of the De-Novo Designed Antimicrobial Peptide SP1-1 in Tomato Confers Resistance to Xanthomonas campestris pv. vesicatoria
Source: PubMed Central journal article supplement (PMC5051901; doi:10.1371/journal.pone.0164097), 2016-10-05
Supplement: pone.0164097.s001.pdf [file pone.0164097.s001.pdf]

# S1 Supporting Information

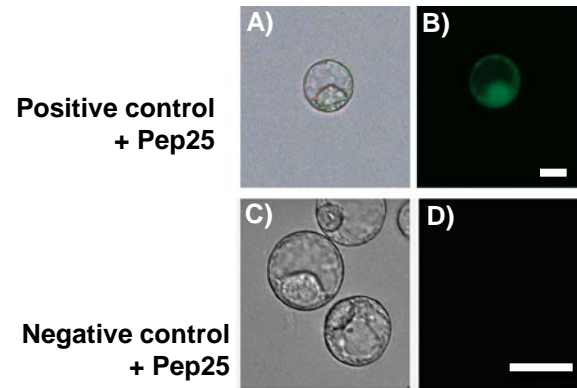

**S1 Fig. Microscopic pictures of transiently transformed protoplasts.** GFP construct containing the CaMV 35S promoter as a positive control (A-B) were transiently transformed into TH3 tomato protoplasts using a modified PEG method. GFP fluorescence was analysed 12 h after Pep25 treatment (A). Non-transformed protoplasts were used as a negative control (C-D). Scale bar: 25  $\mu$ m.
