# Supplementary material for: Inducible Expression of the De-Novo Designed Antimicrobial Peptide SP1-1 in Tomato Confers Resistance to Xanthomonas campestris pv. vesicatoria
Source: PubMed Central journal article supplement (PMC5051901; doi:10.1371/journal.pone.0164097), 2016-10-05
Supplement: pone.0164097.s002.pdf [file pone.0164097.s002.pdf]

## S2 Supporting Information

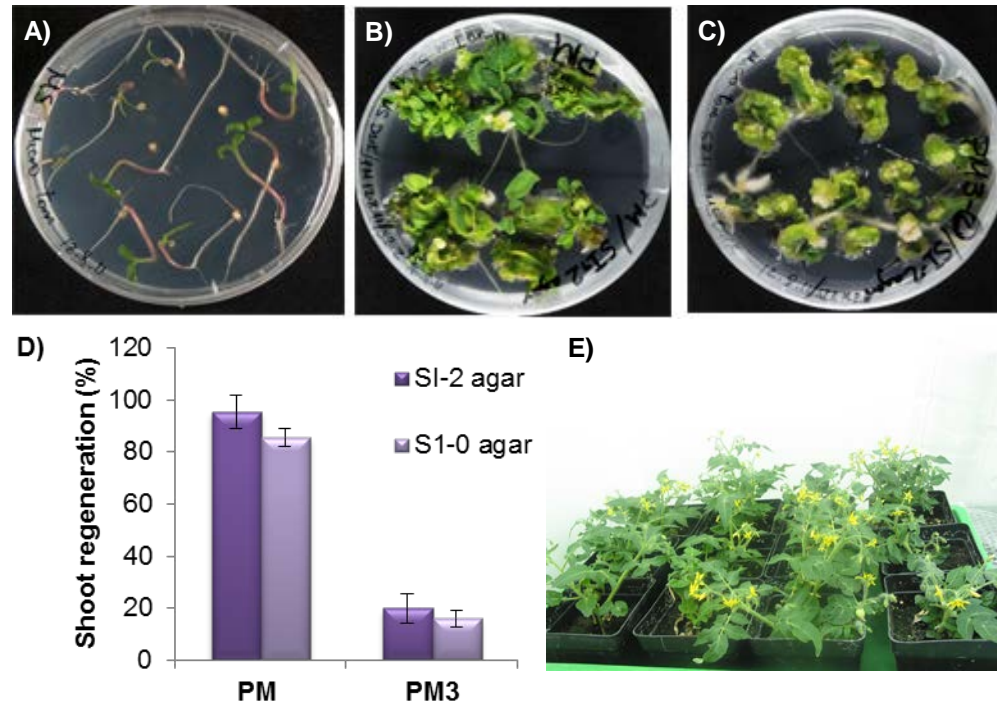

**S2 Fig. Regeneration of tomato Micro Tom plants from cotyledons.** (A) Tomato seedlings growing in MS medium. (B) Shoot formation was induced on PM/SI-2 media after 4 weeks. (C) Callus and shoot formation was induced on PM3/SI-2 media after 4 weeks. (D) Plant regeneration rate in percent. (E) Fertile regenerated plants growing in a climate chamber.
