# Supplementary material for: Inducible Expression of the De-Novo Designed Antimicrobial Peptide SP1-1 in Tomato Confers Resistance to Xanthomonas campestris pv. vesicatoria
Source: PubMed Central journal article supplement (PMC5051901; doi:10.1371/journal.pone.0164097), 2016-10-05
Supplement: pone.0164097.s004.pdf [file pone.0164097.s004.pdf]

## S4 Supporting Information

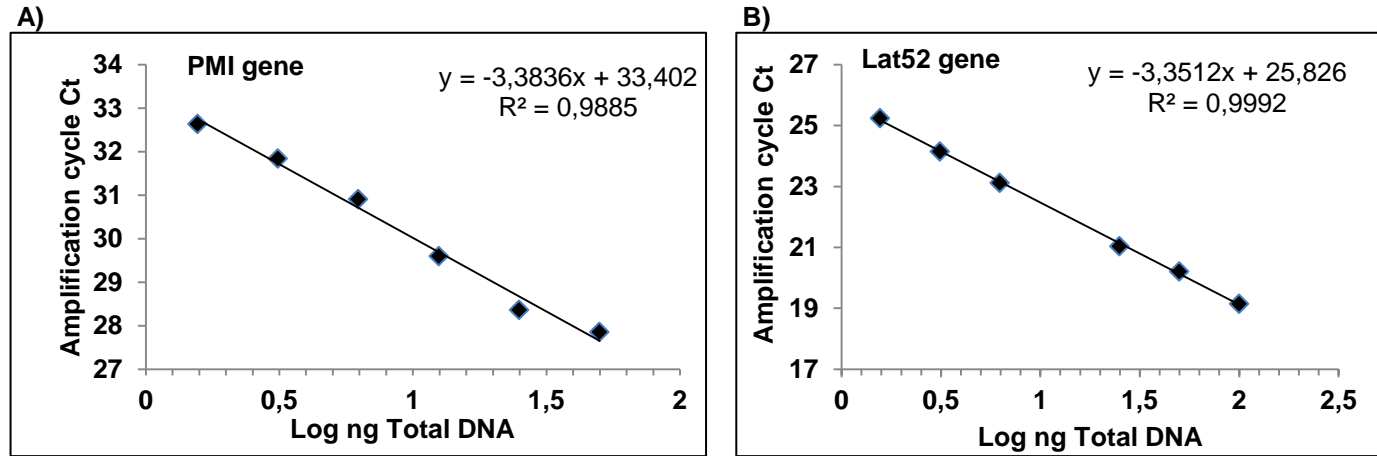

**S4 Fig. Representative standard curves of Real-time PCR amplification of the Phosphomannose isomerase (PMI) gene (A) and the Lat52 endogenous gene (B).** Representative standard curve were obtained from the amplification of twofold serial dilutions of DNA from line T583. Axis: Cycle threshold (Ct) value versus the logarithmic concentration (ng) of total DNA. Dark dots represent the 6 points analyzed by triplicate.
