# Supplementary material for: Inducible Expression of the De-Novo Designed Antimicrobial Peptide SP1-1 in Tomato Confers Resistance to Xanthomonas campestris pv. vesicatoria
Source: PubMed Central journal article supplement (PMC5051901; doi:10.1371/journal.pone.0164097), 2016-10-05
Supplement: pone.0164097.s006.pdf [file pone.0164097.s006.pdf]

## S6 Supporting Information

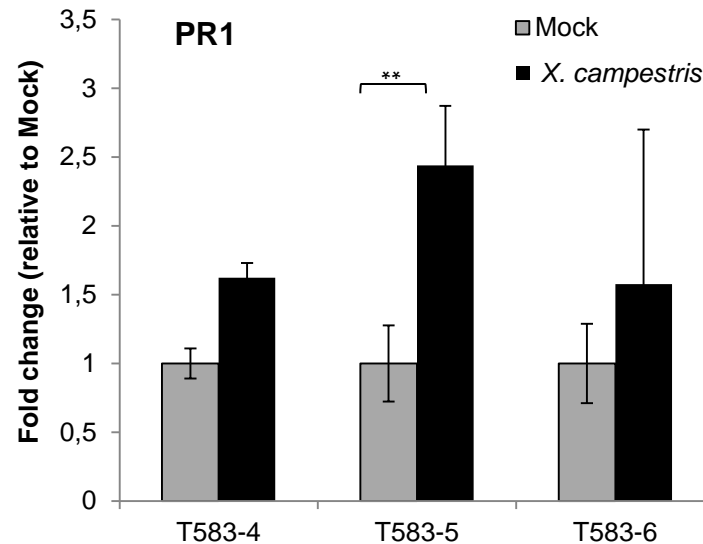

**S6 Fig. Pathogenesis-related 1 (PR1) gene expression in transgenic tomato fruits after *X. campestris* pv. *vesicatoria*.** Expression of *PR1* was analyzed by quantitative RT-PCR in tomato fruits of T583-4, T583-5 and T583-6 36 h after inoculation with *X. campestris* pv. *vesicatoria* and normalized to two internal reference genes (ubiquitin and actin). Expression of *PR1* after Mock treatment ( $\text{MgCl}_2$ ) was set to 1. Fold change of expression of *PR1* in *X. campestris* pv. *vesicatoria* treated samples is given relative to the expression in Mock treated samples. Data are the mean  $\pm$ SD of two to three biological replicates. Significant differences from the control are indicated: \*\*\*,  $P < 0.001$ ; \*\*,  $P < 0.01$  and \*,  $P < 0.05$ .
