# Supplementary material for: Inducible Expression of the De-Novo Designed Antimicrobial Peptide SP1-1 in Tomato Confers Resistance to Xanthomonas campestris pv. vesicatoria
Source: PLOS journal article supplement (doi:10.1371/journal.pone.0164097), 2016-10-05
Supplement: S3 (10.1371/journal.pone.0164097.s003) [file journal.pone.0164097.s003.PDF › journal.pone.0164097.s003.PDF]

## S3 Supporting Information

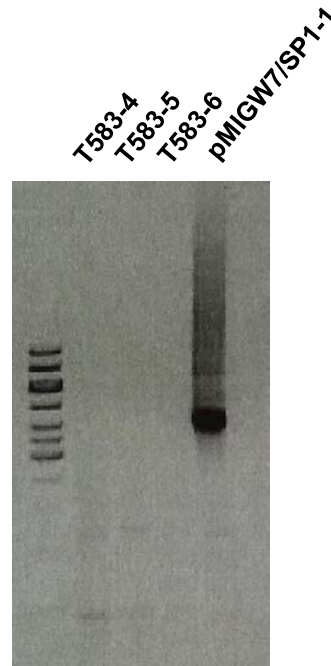

**S3 Fig. Prove that T1 lines do not contain Agrobacterium.** A PCR was performed using primers targeting the binary vector backbone. The following primers have been used: Ext-Flanking-Forward 5`-GAAGCCATGAAAACCGCCAC-3`; Ext-Flanking-Reverse 5`-GCCTGTCGCGTAACTTAGGA-3`. The binary vector pMIGW7/SP1-1 was used as positive control.
