# Supplementary material for: Inducible Expression of the De-Novo Designed Antimicrobial Peptide SP1-1 in Tomato Confers Resistance to Xanthomonas campestris pv. vesicatoria
Source: PLOS journal article supplement (doi:10.1371/journal.pone.0164097), 2016-10-05
Supplement: S5 (10.1371/journal.pone.0164097.s005) [file journal.pone.0164097.s005.PDF › journal.pone.0164097.s005.PDF]

## S5 Supporting Information

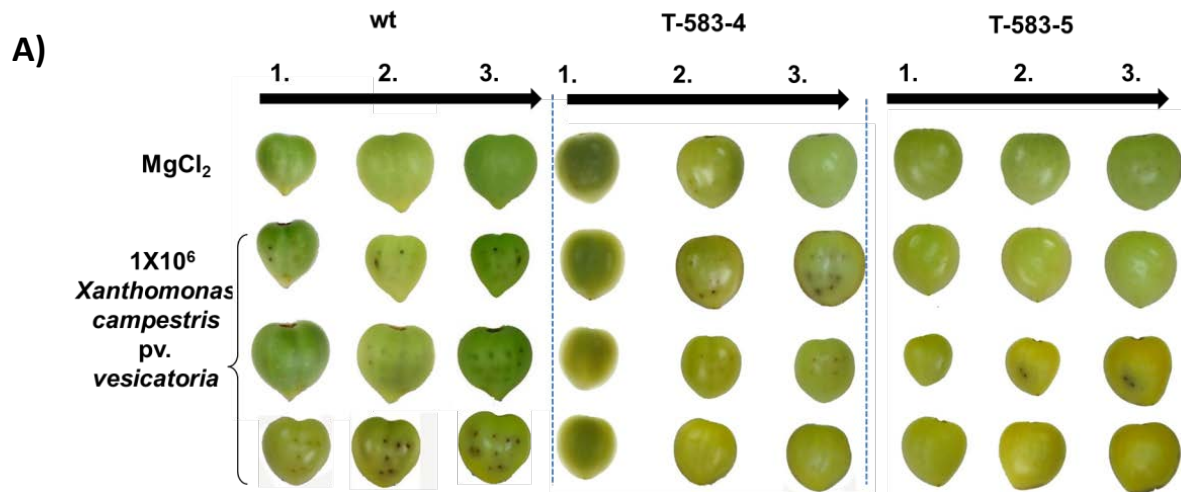

B)

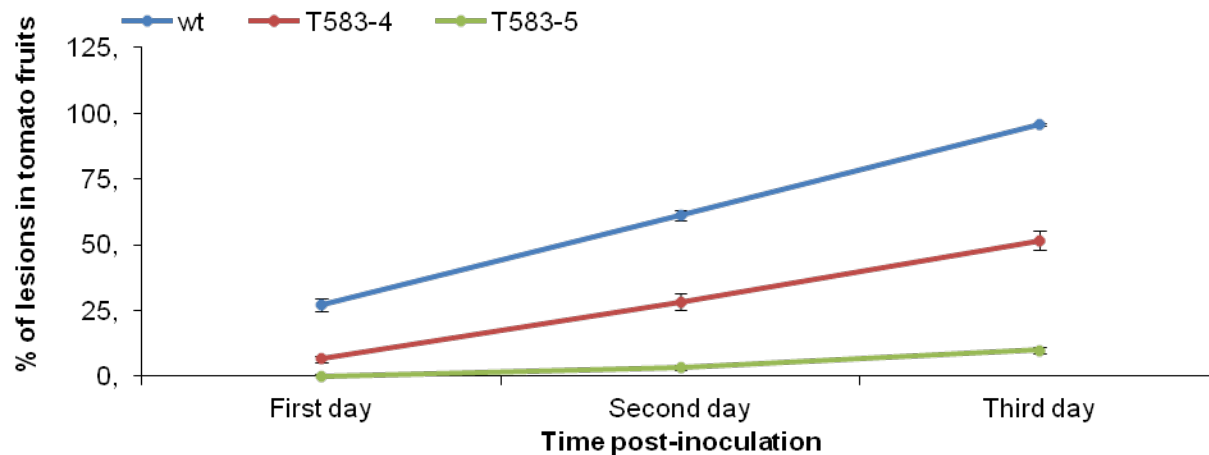

**S5 Fig. Disease development and disease scoring of WT and SP1-1 producing transgenic tomato fruits after inoculation with *X. campestris pv. vesicatoria*.** (A) Disease development in wild-type (WT) and T1 transgenic tomato fruits carrying the transgene SP1-1 (T583-4, T583-5), after mock treatment ( $\text{MgCl}_2$ ) or 1, 2 and 3 days after inoculation with *X. campestris pv. vesicatoria*. (B) Incidence of infection symptoms 1, 2 and 3 days after inoculation with *X. campestris pv. vesicatoria* is given in percentage. The values represent the mean of three independent experiments +/- SE.
